# Supplementary material for: Combinatorial Therapy: Targeting CD133+ Glioma Stem-like Cells with a Polysaccharide–Prodrug Complex Functionalised Gold Nanocages
Source: MDPI journal article supplement (doi:10.3390/biomedicines12050934), 2024-04-23
Supplement: s1 [file s1]

## Supplementary Information

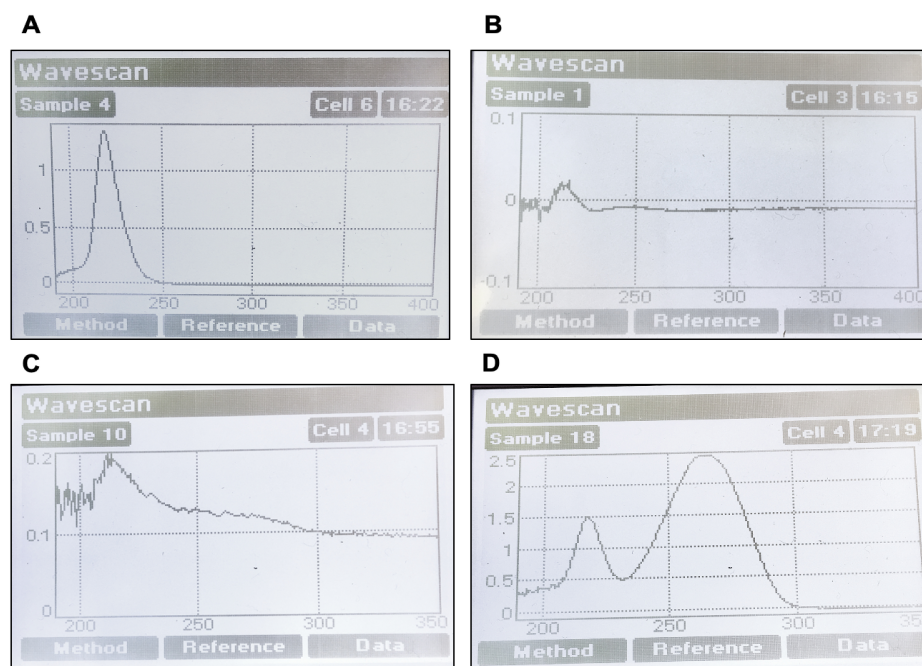

**Figure S1:** Qualitative analysis- UV-Vis spectroscopic measurement of 5FU release profile of from TMFG nanoparticles. **A**, 5FU spectra; **B**, PBS (pH 7.4)- day 13; **C**, PBS (pH 3.15)- day 13; **D**, ABS (pH 3.76)- day 13.

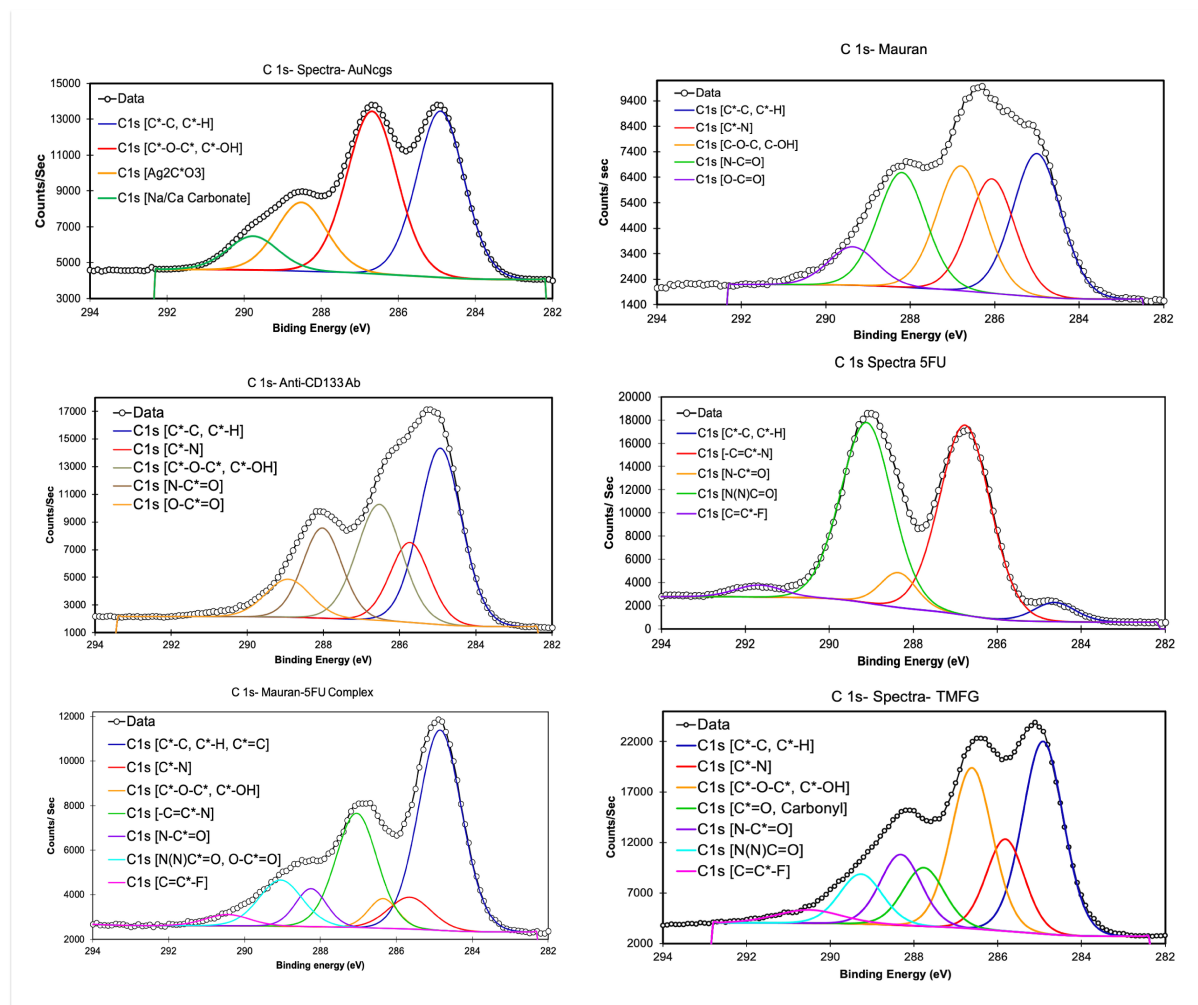

**Figure S2:** High resolution C 1s XPS spectra of **A**, AuNcgs; **B**, Mauran; **C**, Anti-CD-133 antibody; **D**, 5FU; **E**, Mauran-5FU complex; **F**, TMFG nanoparticles
